Exams are available online only at [cme.psychiatryonline.org](http://cme.psychiatryonline.org)

## INFORMATION TO PARTICIPANTS

**OBJECTIVES.** After evaluating a specific journal article published in the American Journal of Psychiatry, participants should be able to demonstrate an increase in their knowledge of clinical medicine. Participants should be able to understand the contents of a selected research or review article and to apply the new findings to their clinical practice.

**PARTICIPANTS.** This program is designed for all psychiatrists in clinical practice, residents in Graduate Medical Education programs, medical students interested in psychiatry, and other physicians who wish to advance their current knowledge of clinical medicine.

**EXPLANATION OF HOW PHYSICIANS CAN PARTICIPATE AND EARN CREDIT.** In order to earn CME credit, subscribers should read through

the material presented in the article. After reading the article, complete the CME quiz online at [cme.psychiatryonline.org](http://cme.psychiatryonline.org) and submit your evaluation and study hours (up to 1 *AMA PRA Category 1 Credit*<sup>TM</sup>).

**CREDITS.** The APA designates this educational activity for a maximum of 1 *AMA PRA Category 1 Credit*<sup>TM</sup>. Physicians should only claim credit commensurate with the extent of their participation in the activity. The American Psychiatric Association (APA) is accredited by the Accreditation Council for Continuing Medical Education (ACCME) to provide continuing medical education (CME) for physicians.

**Estimated Time to Complete: 1 Hour**

Begin date September 1, 2007 – End date August 31, 2009

## EXAMINATION QUESTIONS

Select the single best answer for each question below.

### Antidepressant Use in the Postpartum Period: Practical Considerations

Jennifer L. Payne

Am J Psychiatry 2007; 164:1329-1332

**QUESTION 1.** The strongest predictor that women with postpartum depression will ultimately develop bipolar disorder is which of the following?

- A. The age of the woman
- B. Rapid onset of symptoms after delivery
- C. Family history of bipolar disorder
- D. History of substance abuse

**QUESTION 2.** Compared to breast milk exposure, infant drug exposure through placental passage has which of the following characteristics?

- A. The same amount of infant exposure per dose of maternal antidepressant medication
- B. Higher exposure from placental passage than through breast milk
- C. Lower exposure from placental passage than through breast milk

**QUESTION 3.** Postpartum depression (meeting DSM-IV major depressive episode definition) occurs in what percent of women following delivery?

- A. 20%
- B. 30%
- C. 40%
- D. 50%

## EVALUATION QUESTIONS

This evaluation form is adapted from the *MedBiquitous Journal-Based Continuing Education Guidelines 28 November 2005*. This evaluation will appear online at the end of each CME course. Participants must complete this evaluation in order to receive credit. Select the response which best indicates your reaction to the following statements about this activity.

**STATEMENT 1.** The activity achieved its stated objectives

- 1. Strongly agree
- 2. Agree
- 3. Neutral
- 4. Disagree
- 5. Strongly disagree

**STATEMENT 2.** The activity was relevant to my practice.

- 1. Strongly agree
- 2. Agree
- 3. Neutral
- 4. Disagree
- 5. Strongly disagree

**STATEMENT 3.** I plan to change my current practice based on what I learned in the activity.

- 1. Strongly agree
- 2. Agree
- 3. Neutral
- 4. Disagree
- 5. Strongly disagree

**STATEMENT 4.** The activity validated my current practice.

- 1. Strongly agree
- 2. Agree
- 3. Neutral
- 4. Disagree
- 5. Strongly disagree

**STATEMENT 5.** The activity provided sufficient scientific evidence to support the content presented.

- 1. Strongly agree
- 2. Agree
- 3. Neutral
- 4. Disagree
- 5. Strongly disagree

**STATEMENT 6.** The activity was free of commercial bias toward a particular product or company.

- 1. Strongly agree
- 2. Agree
- 3. Neutral
- 4. Disagree
- 5. Strongly disagree

Exams are available online only at [cme.psychiatryonline.org](http://cme.psychiatryonline.org)

## INFORMATION TO PARTICIPANTS

**OBJECTIVES.** After evaluating a specific journal article published in the American Journal of Psychiatry, participants should be able to demonstrate an increase in their knowledge of clinical medicine. Participants should be able to understand the contents of a selected research or review article and to apply the new findings to their clinical practice.

**PARTICIPANTS.** This program is designed for all psychiatrists in clinical practice, residents in Graduate Medical Education programs, medical students interested in psychiatry, and other physicians who wish to advance their current knowledge of clinical medicine.

**EXPLANATION OF HOW PHYSICIANS CAN PARTICIPATE AND EARN CREDIT.** In order to earn CME credit, subscribers should read through

the material presented in the article. After reading the article, complete the CME quiz online at [cme.psychiatryonline.org](http://cme.psychiatryonline.org) and submit your evaluation and study hours (up to 1 *AMA PRA Category 1 Credit™*).

**CREDITS.** The APA designates this educational activity for a maximum of 1 *AMA PRA Category 1 Credit™*. Physicians should only claim credit commensurate with the extent of their participation in the activity. The American Psychiatric Association (APA) is accredited by the Accreditation Council for Continuing Medical Education (ACCME) to provide continuing medical education (CME) for physicians.

**Estimated Time to Complete: 1 Hour**

Begin date September 1, 2007 – End date August 31, 2009

## EXAMINATION QUESTIONS

Select the single best answer for each question below.

### Adjunctive Antidepressant Use and Symptomatic Recovery Among Bipolar Depressed Patients With Concomitant Manic Symptoms: Findings From the STEP-BD

Joseph F. Goldberg et al.

Am J Psychiatry 2007; 164:1348-1355

**QUESTION 1.** At the time bipolar depressed patients entered the STEP-BD study, those who were prescribed a mood stabilizer plus an antidepressant had which of the following clinical characteristics compared with patients receiving only a mood stabilizer?

- A. Younger age
- B. Female gender
- C. More prior depressive episodes
- D. Lesser severity of mania symptoms

**QUESTION 2.** For STEP-BD bipolar depressed patients with concomitant manic symptoms, which one of the following features was significantly associated with recovery at 3 months?

- A. Duration of time spent on antidepressant
- B. Lifetime number of manic episodes
- C. Bipolar II subtype
- D. Lower depression severity at baseline

**QUESTION 3.** When adjunctive antidepressants were added to mood stabilizers in bipolar patients whose depressive episodes were accompanied by mania symptoms, which of the following outcomes were observed?

- A. Overall recovery was faster.
- B. Overall recovery was slower.
- C. Depressive symptoms remit no faster but mania symptoms worsen.
- D. Depressive symptoms improve faster but mania symptoms worsen.

## EVALUATION QUESTIONS

This evaluation form is adapted from the MedBiquitous Journal-Based Continuing Education Guidelines 28 November 2005.

This evaluation will appear online at the end of each CME course. Participants must complete this evaluation in order to receive credit. Select the response which best indicates your reaction to the following statements about this activity.

**STATEMENT 1.** The activity achieved its stated objectives

- 1. Strongly agree
- 2. Agree
- 3. Neutral
- 4. Disagree
- 5. Strongly disagree

**STATEMENT 2.** The activity was relevant to my practice.

- 1. Strongly agree
- 2. Agree
- 3. Neutral
- 4. Disagree
- 5. Strongly disagree

**STATEMENT 3.** I plan to change my current practice based on what I learned in the activity.

- 1. Strongly agree
- 2. Agree
- 3. Neutral
- 4. Disagree
- 5. Strongly disagree

**STATEMENT 4.** The activity validated my current practice.

- 1. Strongly agree
- 2. Agree
- 3. Neutral
- 4. Disagree
- 5. Strongly disagree

**STATEMENT 5.** The activity provided sufficient scientific evidence to support the content presented.

- 1. Strongly agree
- 2. Agree
- 3. Neutral
- 4. Disagree
- 5. Strongly disagree

**STATEMENT 6.** The activity was free of commercial bias toward a particular product or company.

- 1. Strongly agree
- 2. Agree
- 3. Neutral
- 4. Disagree
- 5. Strongly disagree

Exams are available online only at [cme.psychiatryonline.org](http://cme.psychiatryonline.org)

## INFORMATION TO PARTICIPANTS

**OBJECTIVES.** After evaluating a specific journal article published in the American Journal of Psychiatry, participants should be able to demonstrate an increase in their knowledge of clinical medicine. Participants should be able to understand the contents of a selected research or review article and to apply the new findings to their clinical practice.

**PARTICIPANTS.** This program is designed for all psychiatrists in clinical practice, residents in Graduate Medical Education programs, medical students interested in psychiatry, and other physicians who wish to advance their current knowledge of clinical medicine.

**EXPLANATION OF HOW PHYSICIANS CAN PARTICIPATE AND EARN CREDIT.** In order to earn CME credit, subscribers should read through

the material presented in the article. After reading the article, complete the CME quiz online at [cme.psychiatryonline.org](http://cme.psychiatryonline.org) and submit your evaluation and study hours (up to 1 *AMA PRA Category 1 Credit™*).

**CREDITS.** The APA designates this educational activity for a maximum of 1 *AMA PRA Category 1 Credit™*. Physicians should only claim credit commensurate with the extent of their participation in the activity. The American Psychiatric Association (APA) is accredited by the Accreditation Council for Continuing Medical Education (ACCME) to provide continuing medical education (CME) for physicians.

**Estimated Time to Complete: 1 Hour**

Begin date September 1, 2007 – End date August 31, 2009

## EXAMINATION QUESTIONS

Select the single best answer for each question below.

### Nonresponse to Treatment for Depression Following Myocardial Infarction: Association With Subsequent Cardiac Events?

Peter de Jonge et al.

Am J Psychiatry 2007; 164:1371-1378

**QUESTION 1.** Which of the following statements best describes the association between depression and cardiovascular prognosis?

- A. Cardiovascular prognosis is improved by antidepressant treatment regardless of mood status.
- B. Absence of depression following myocardial infarction is associated with better cardiovascular prognosis.
- C. Antidepressant medications have been consistently shown to have a direct cardioprotective effect.
- D. Mood effects on cardiac prognosis have been established only within the context of acute infarction.

**QUESTION 2.** Among post-myocardial infarction patients, this study found that prospective cardiac events occurred more frequently in which of the following groups?

- A. Patients treated for depression who had an incomplete response
- B. Patients receiving no treatment for depression
- C. Patients who successfully responded to antidepressants
- D. There was no difference across the patient groups

**QUESTION 3.** Which of the following physiologic processes represents a mechanism that has been implicated as a possible contributor to cardiac morbidity in the context of depression?

- A. Increased sympathetic activation of the autonomous nervous system
- B. Reduced platelet reactivity
- C. Reduced immune system activity
- D. Increased parasympathetic activity of the autonomic nervous system

## EVALUATION QUESTIONS

This evaluation form is adapted from the *MedBiquitous Journal-Based Continuing Education Guidelines* 28 November 2005.

This evaluation will appear online at the end of each CME course. Participants must complete this evaluation in order to receive credit. Select the response which best indicates your reaction to the following statements about this activity.

**STATEMENT 1.** The activity achieved its stated objectives

- 1. Strongly agree
- 2. Agree
- 3. Neutral
- 4. Disagree
- 5. Strongly disagree

**STATEMENT 2.** The activity was relevant to my practice.

- 1. Strongly agree
- 2. Agree
- 3. Neutral
- 4. Disagree
- 5. Strongly disagree

**STATEMENT 3.** I plan to change my current practice based on what I learned in the activity.

- 1. Strongly agree
- 2. Agree
- 3. Neutral
- 4. Disagree
- 5. Strongly disagree

**STATEMENT 4.** The activity validated my current practice.

- 1. Strongly agree
- 2. Agree
- 3. Neutral
- 4. Disagree
- 5. Strongly disagree

**STATEMENT 5.** The activity provided sufficient scientific evidence to support the content presented.

- 1. Strongly agree
- 2. Agree
- 3. Neutral
- 4. Disagree
- 5. Strongly disagree

**STATEMENT 6.** The activity was free of commercial bias toward a particular product or company.

- 1. Strongly agree
- 2. Agree
- 3. Neutral
- 4. Disagree
- 5. Strongly disagree
