# THE AMERICAN JOURNAL OF PSYCHIATRY

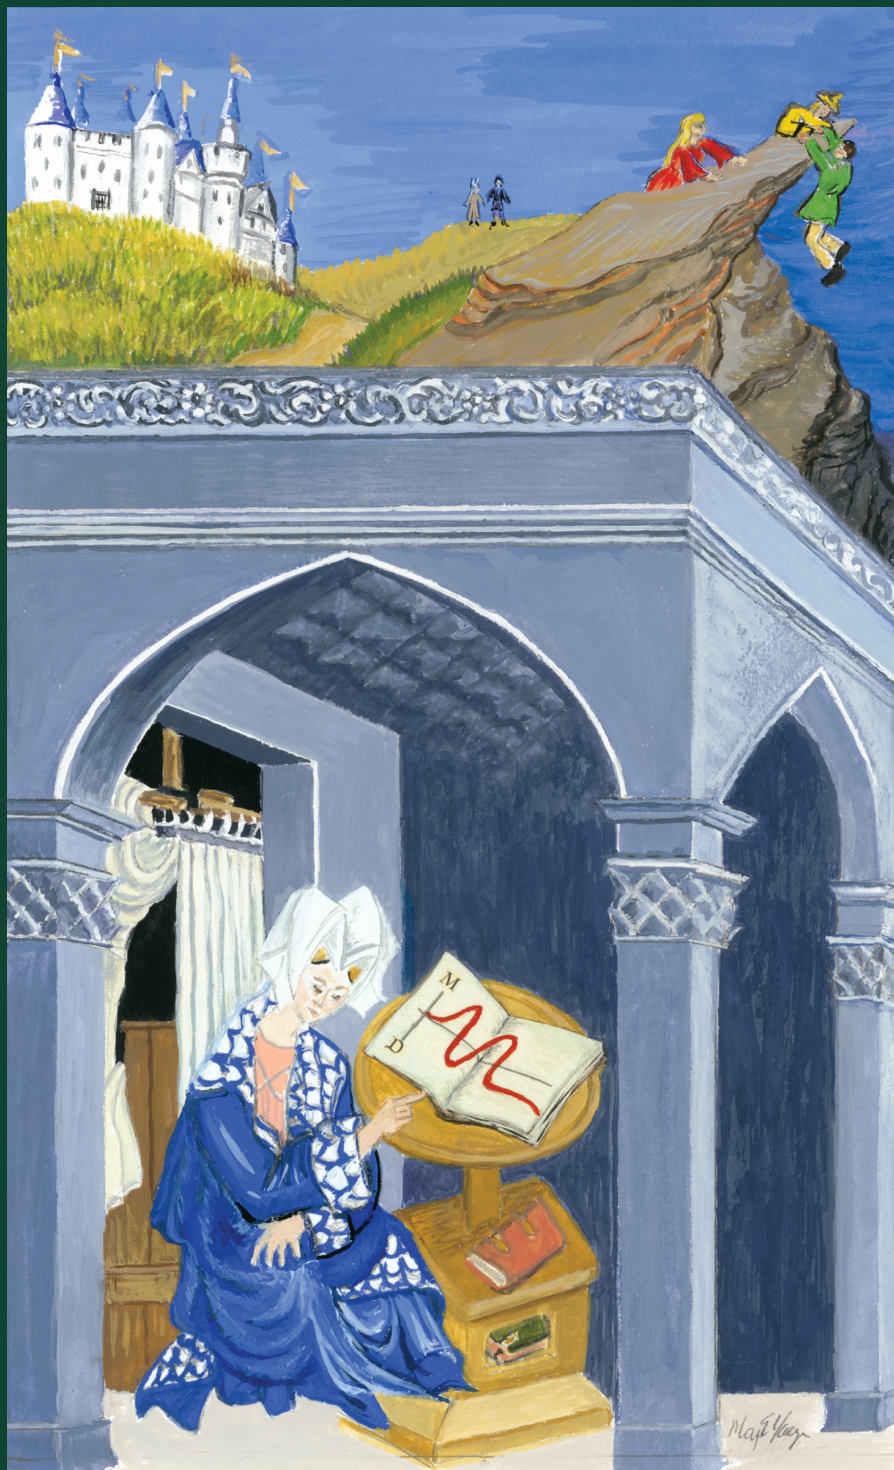

**Antidepressant Use in the Postpartum  
Period: Practical Considerations**  
Jennifer L. Payne 1329

**Intensive Psychosocial Intervention  
Enhances Functioning in Patients With  
Bipolar Depression: Results From a  
9-Month Randomized Controlled Trial**  
David J. Miklowitz et al. 1340

**Adjunctive Antidepressant Use  
and Symptomatic Recovery Among  
Bipolar Depressed Patients With  
Concomitant Manic Symptoms:  
Findings From the STEP-BD**  
Joseph F. Goldberg et al. 1348

**Differences in PTSD Prevalence and  
Associated Risk Factors Among World  
Trade Center Disaster Rescue and  
Recovery Workers**  
Megan A. Perrin 1385

**Continuing Medical Education** 1454

**September 2007**

**Volume 164 • Number 9**

Official Journal of the  
AMERICAN PSYCHIATRIC ASSOCIATION

[ajp.psychiatryonline.org](http://ajp.psychiatryonline.org)
